# Supplementary material
Source: publisher site journal article supplement (https://www.spandidos-publications.com/5929/downloadSupplementary)

Figure S1. (A) Raw sequencing results of the WPRE PCR product. (B) Basic Local Alignment Search Tool analysis. The sequenced product was highly similar to the target sequence of WPRE (J04514.1) in the National Center for Biotechnology Information gene library, indicating successful PCR amplification. WPRE, woodduck hepatitis virus posttranscriptional element.

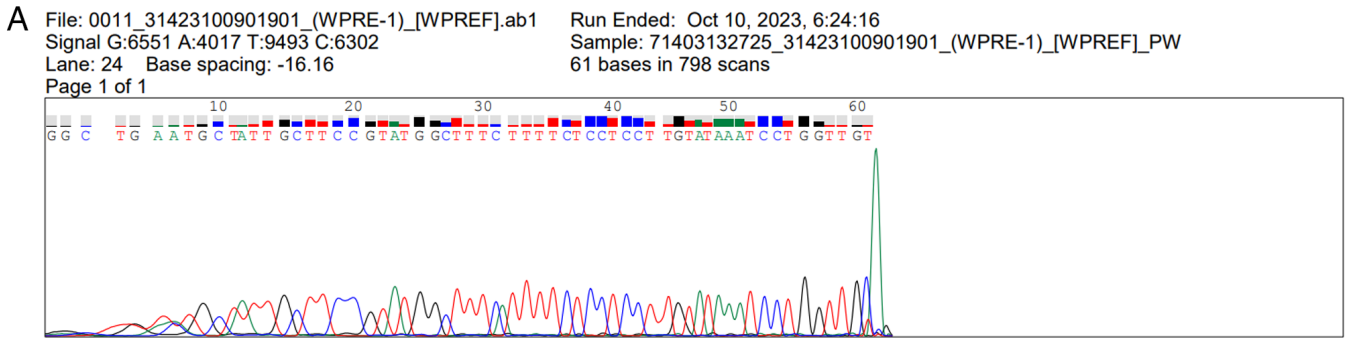

**B**

|                                                                                   |                                                          |            |                               |           |
|-----------------------------------------------------------------------------------|----------------------------------------------------------|------------|-------------------------------|-----------|
| Sequence ID: <a href="#">gi 336146 J04514.1</a> Length: 3323 Number of Matches: 1 |                                                          |            |                               |           |
| Range 1: 1196 to 1251 <a href="#">GenBank</a> <a href="#">Graphics</a>            |                                                          |            | ▼ Next Match ▲ Previous Match |           |
| Score                                                                             | Expect                                                   | Identities | Gaps                          | Strand    |
| 86.0 bits(94)                                                                     | 8e-14                                                    | 54/56(96%) | 2/56(3%)                      | Plus/Plus |
| Query 7                                                                           | ATGCTATTGCTTCC-GTATGGCTTTC-TTTTCTCCTCCTTGATAAAATCCTGGTTG |            |                               | 60        |
| Sbjct 1196                                                                        | ATGCTATTGCTTCCCGTATGGCTTTCATTTTCTCCTCCTTGATAAAATCCTGGTTG |            |                               | 1251      |

Figure S2. (A) Raw sequencing results of the sh-Salusin-β<sub>1</sub> PCR product. (B) Basic Local Alignment Search Tool analysis. The sequencing results were compared and analyzed with the DNA sequence of the pLKO.1-sh-Salusin-β<sub>1</sub> recombinant plasmid using SnapGene v6.0.2 software. It was found that the PCR product sample showed a high similarity to the target fragment sequence of the sh-Salusin-β<sub>1</sub> amplification primers, indicating successful PCR amplification. sh, short hairpin RNA.

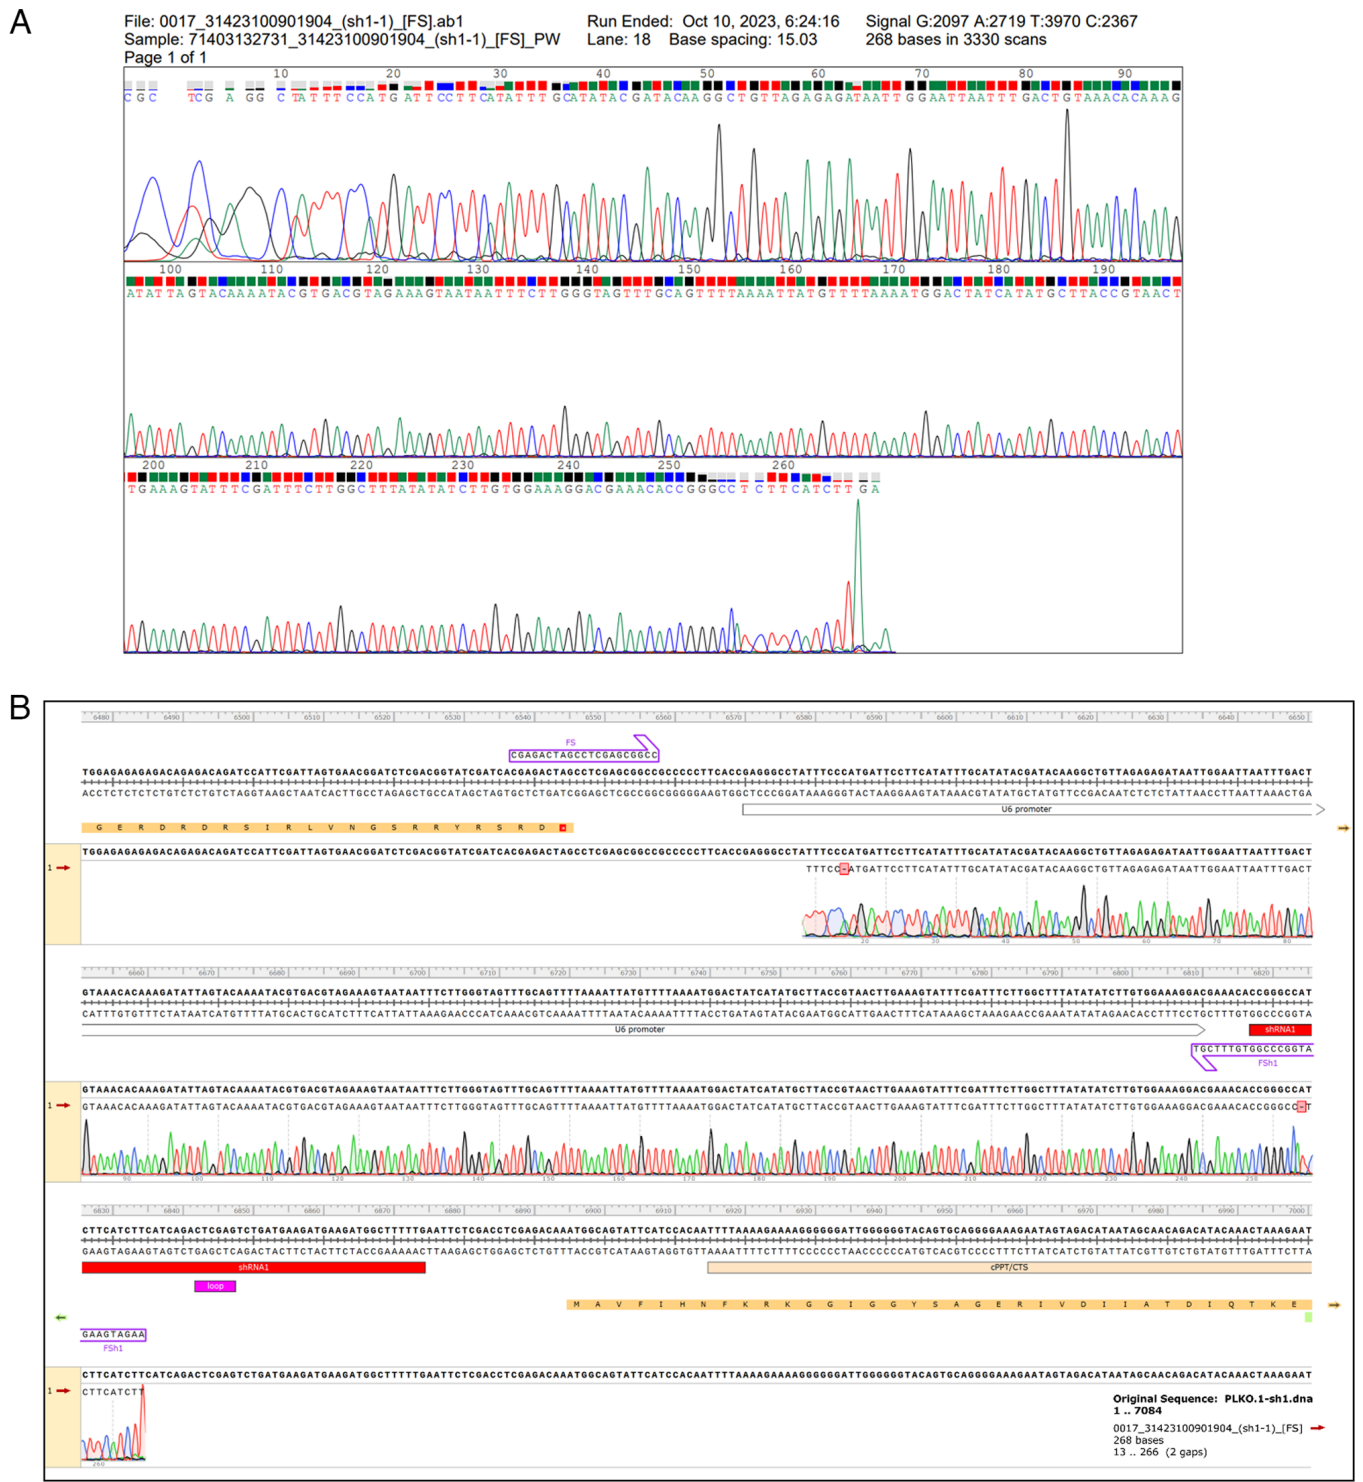

Figure S3. (A) Raw sequencing results of the sh-Salusin-β<sub>2</sub> PCR product. (B) Basic Local Alignment Search Tool analysis. The sequencing results were compared and analyzed with the DNA sequence of the pLKO.1-sh-Salusin-β<sub>2</sub> recombinant plasmid using SnapGene v6.0.2 software. It was found that the PCR product sample showed a high similarity to the target fragment sequence of the sh-Salusin-β<sub>2</sub> amplification primers, indicating successful PCR amplification. sh, short hairpin RNA.

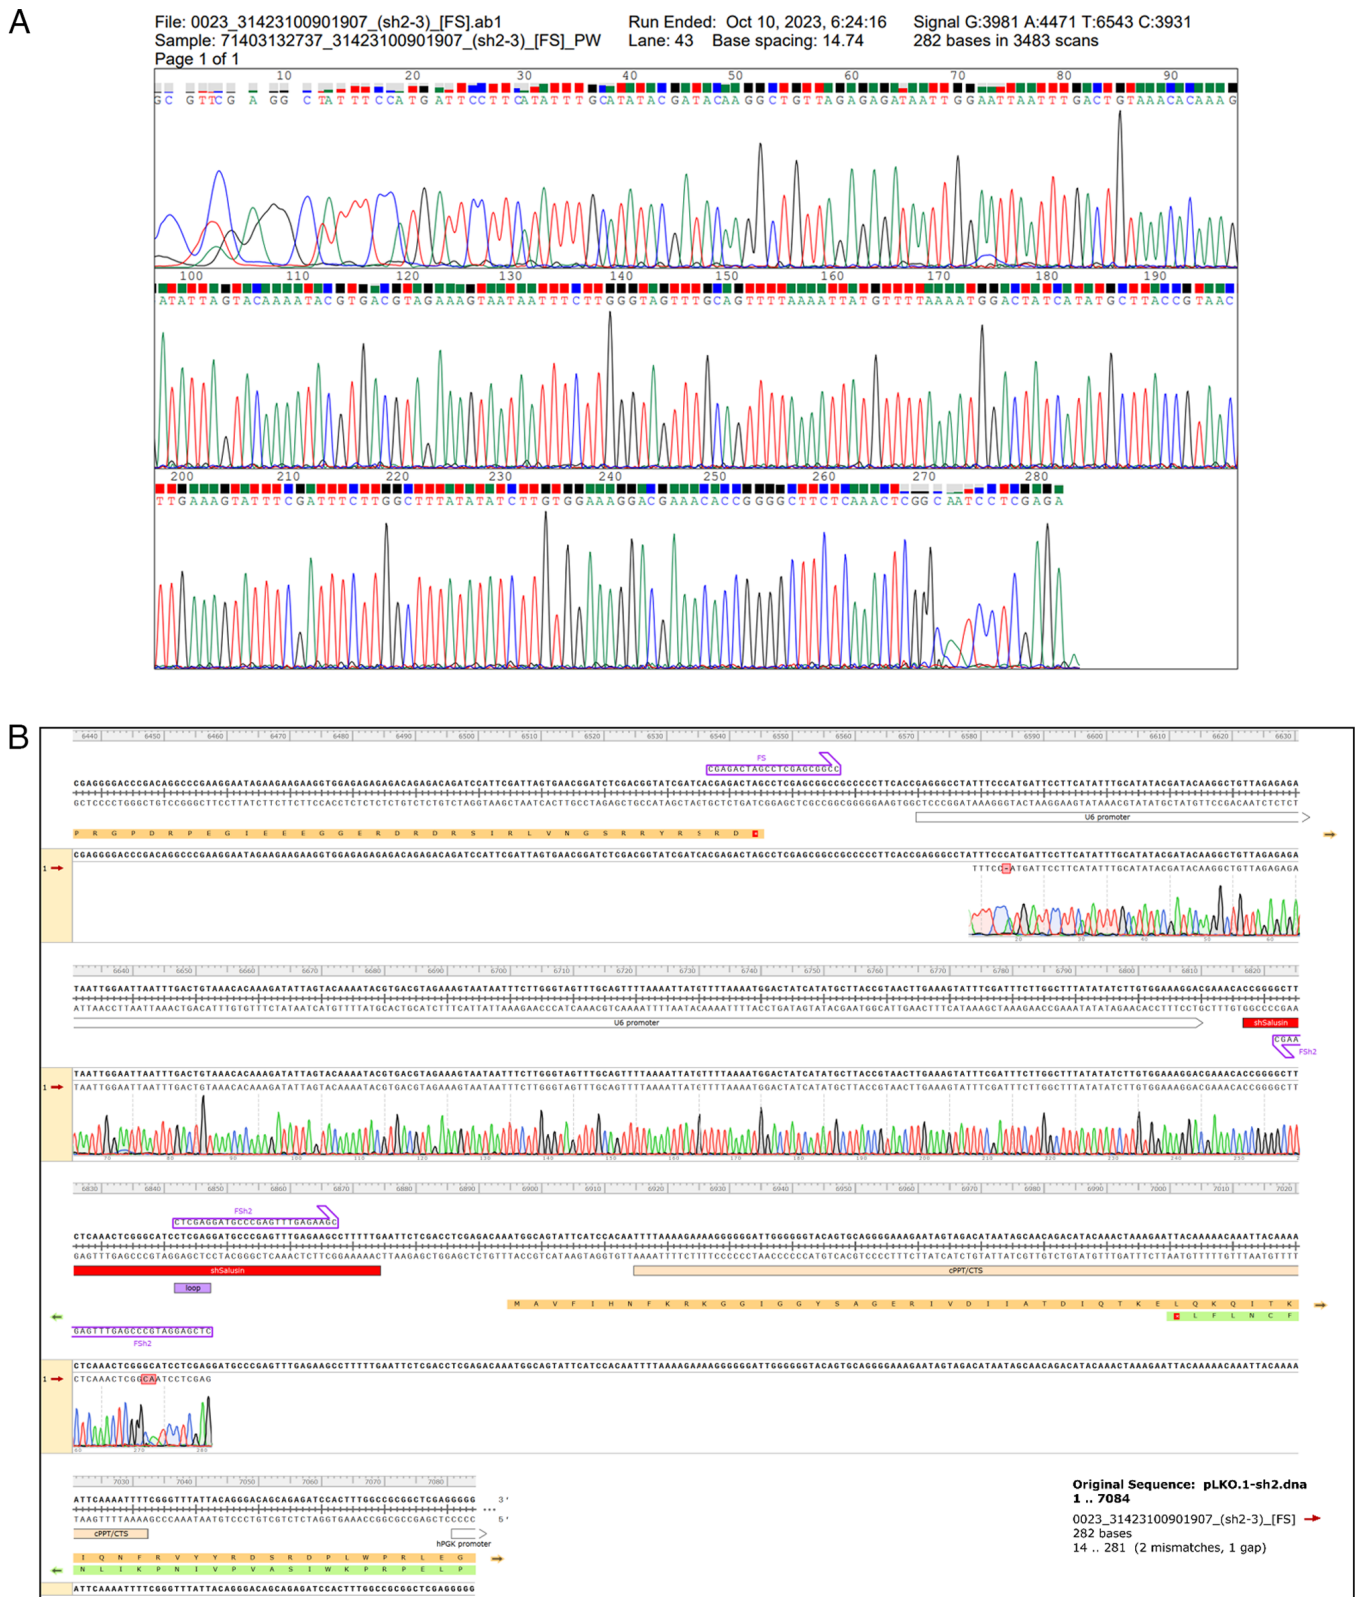

Figure S4. (A) Raw sequencing results of the sh-Salusin-β<sub>3</sub> PCR product. (B) Basic Local Alignment Search Tool analysis. The sequencing results were compared and analyzed with the DNA sequence of the pLKO.1-sh-Salusin-β<sub>3</sub> recombinant plasmid using SnapGene v6.0.2 software. It was found that the PCR product sample showed a high similarity to the target fragment sequence of the sh-Salusin-β<sub>3</sub> amplification primers, indicating successful PCR amplification. sh, short hairpin RNA.

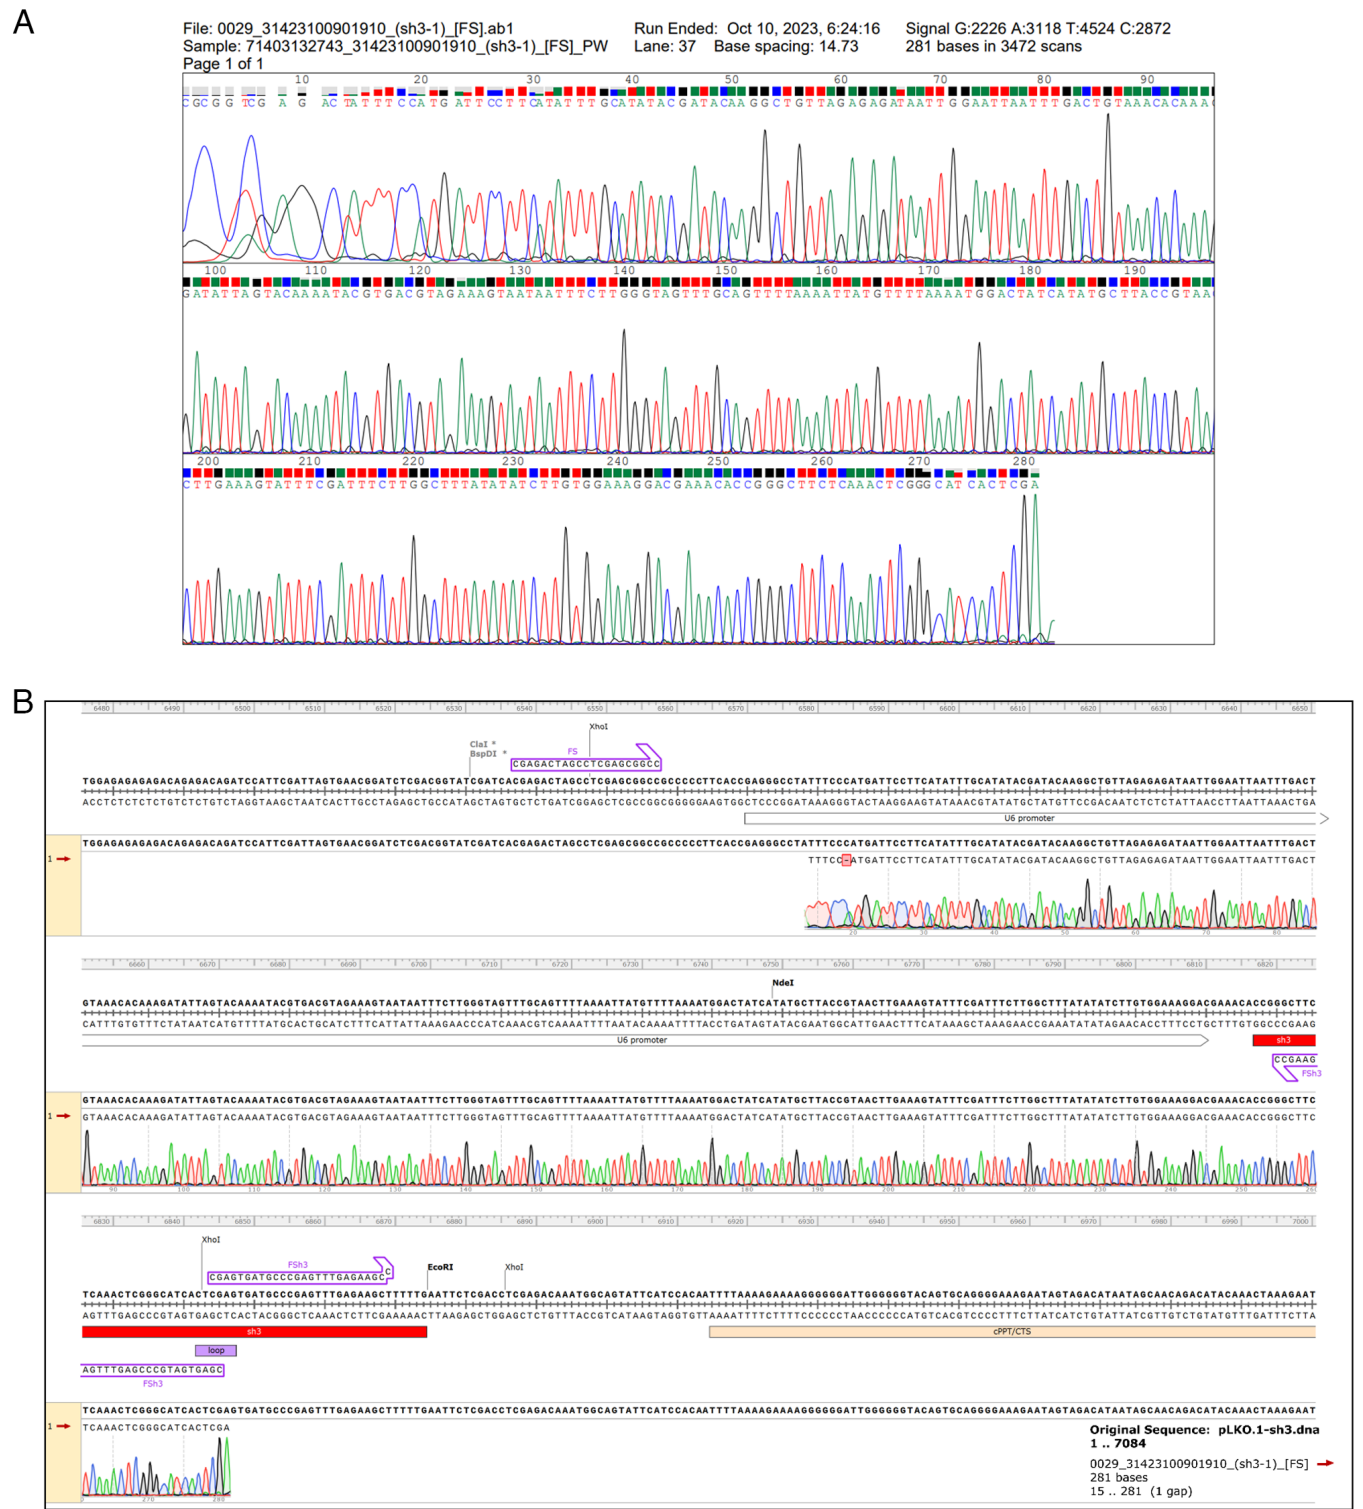



Figure S5. (A) Raw sequencing results of AdipoR1 PCR product. (B) Basic Local Alignment Search Tool analysis. The sequencing product was highly similar to the target sequence of AdipoR1 (NM\_015999.6) in the National Center for Biotechnology Information gene library, indicating successful PCR amplification. AdipoR1, adiponectin receptor 1.

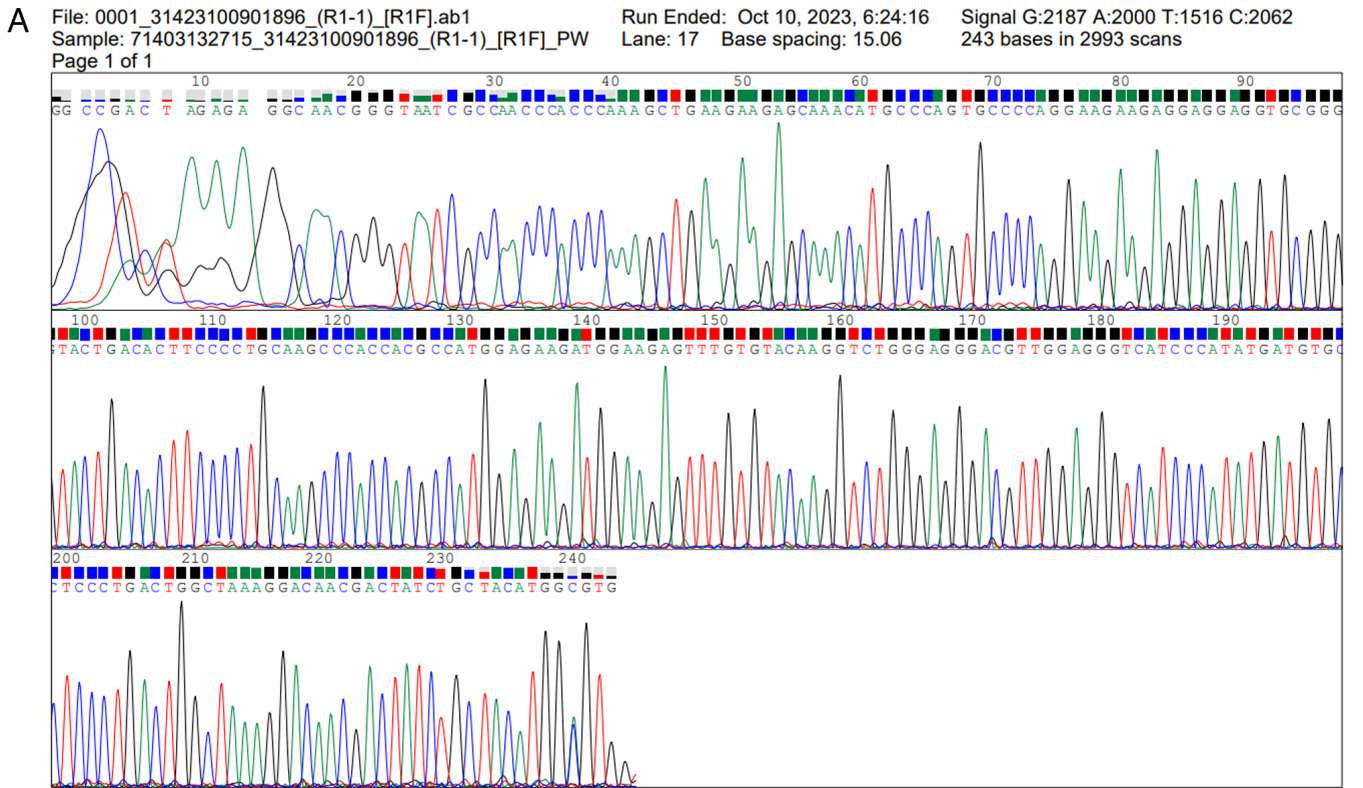

**B**

|                                                                                                                 |                                                               |               |           |           |
|-----------------------------------------------------------------------------------------------------------------|---------------------------------------------------------------|---------------|-----------|-----------|
| Sequence ID: <a href="#">gi 1519315031 NM_015999.6</a> Length: 2091 Number of Matches: 1                        |                                                               |               |           |           |
| Range 1: 338 to 560 <a href="#">GenBank</a> <a href="#">Graphics</a> <span>▼ Next Match ▲ Previous Match</span> |                                                               |               |           |           |
| Score                                                                                                           | Expect                                                        | Identities    | Gaps      | Strand    |
| 403 bits(446)                                                                                                   | 7e-110                                                        | 223/223(100%) | 0/223(0%) | Plus/Plus |
| Query 17                                                                                                        | AACGGGTAATCGCCAACCCACCCAAAGCTGAAGAAGAGCAAACATGCCAGTGCCCCAGG   | 76            |           |           |
| Sbjct 338                                                                                                       | AACGGGTAATCGCCAACCCACCCAAAGCTGAAGAAGAGCAAACATGCCAGTGCCCCAGG   | 397           |           |           |
| Query 77                                                                                                        | AAGAAGAGGAGGAGGTGCGGTAAGTACTGACACTTCCCTGCAAGCCACCACGCCATGGAGA | 136           |           |           |
| Sbjct 398                                                                                                       | AAGAAGAGGAGGAGGTGCGGTAAGTACTGACACTTCCCTGCAAGCCACCACGCCATGGAGA | 457           |           |           |
| Query 137                                                                                                       | AGATGGAAGAGTTTGTGTACAAGTCTGGGAGGGACGTTGGAGGGTCATCCCATATGATG   | 196           |           |           |
| Sbjct 458                                                                                                       | AGATGGAAGAGTTTGTGTACAAGTCTGGGAGGGACGTTGGAGGGTCATCCCATATGATG   | 517           |           |           |
| Query 197                                                                                                       | TGCTCCCTGACTGGCTAAAGGACAACGACTATCTGCTACATGG                   | 239           |           |           |
| Sbjct 518                                                                                                       | TGCTCCCTGACTGGCTAAAGGACAACGACTATCTGCTACATGG                   | 560           |           |           |

Figure S6. (A) Raw sequencing results of Salusin-β PCR product. The top image are the forward sequencing results, while the bottom image indicates the reverse sequencing results for the same Salusin-β PCR product. (B) Basic Local Alignment Search Tool analysis. The 598-657 bases of the TOR2A nucleotide sequence (NM\_001134430.3) in the National Center for Biotechnology Information gene library encode Salusin-β. The forward sequencing result of a PCR amplification product sample was highly similar to the 620-657 bases of this target sequence, while the reverse sequencing result was highly similar to the 598-620 bases. This indicated successful PCR amplification, replicating the desired region of the Salusin-β target sequence. TOR2A, torsin family 2 member A.

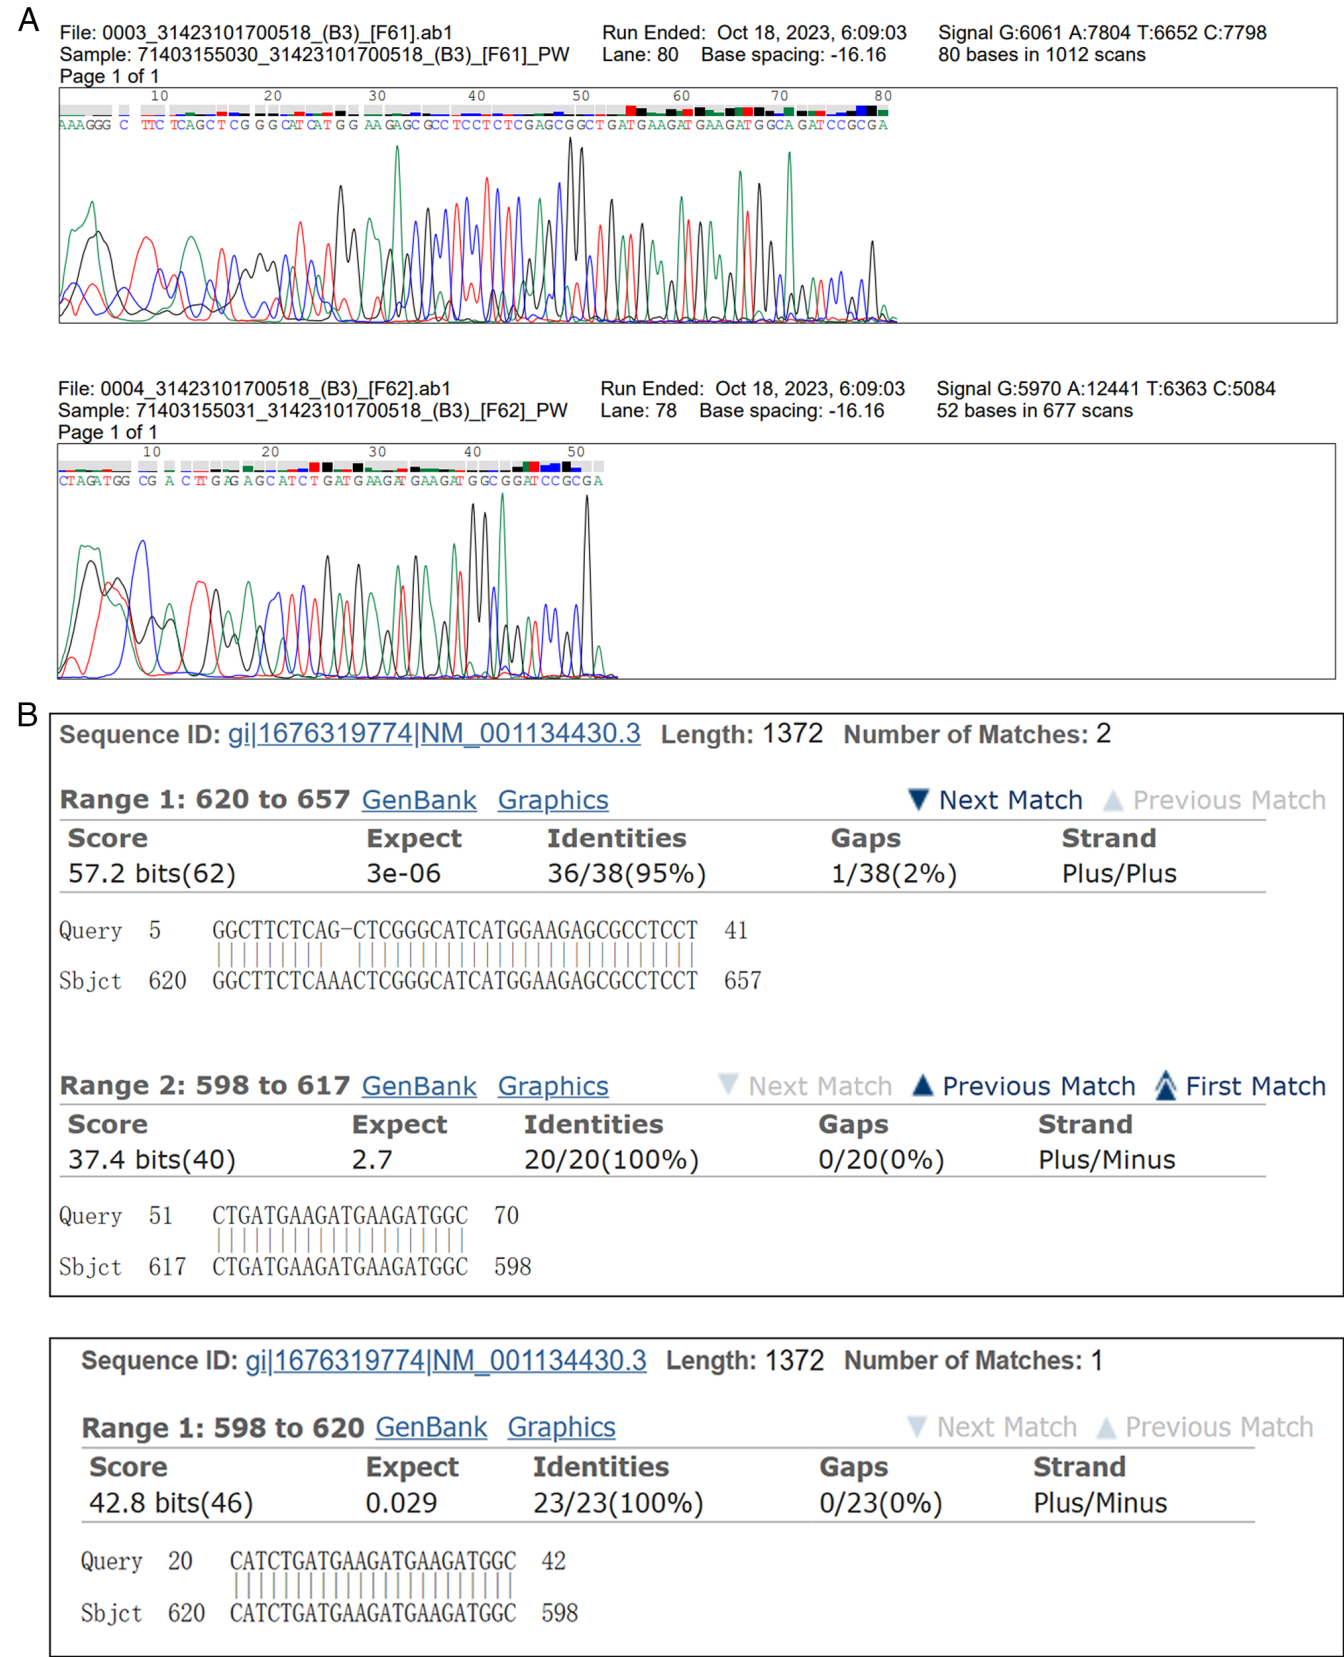

Figure S7. (A) Raw sequencing results of the GAPDH PCR product. (B) Basic Local Alignment Search Tool analysis. The sequencing product was highly similar to the target sequence of GAPDH (XM\_004052561.4) in the National Center for Biotechnology Information gene library, indicating successful PCR amplification.

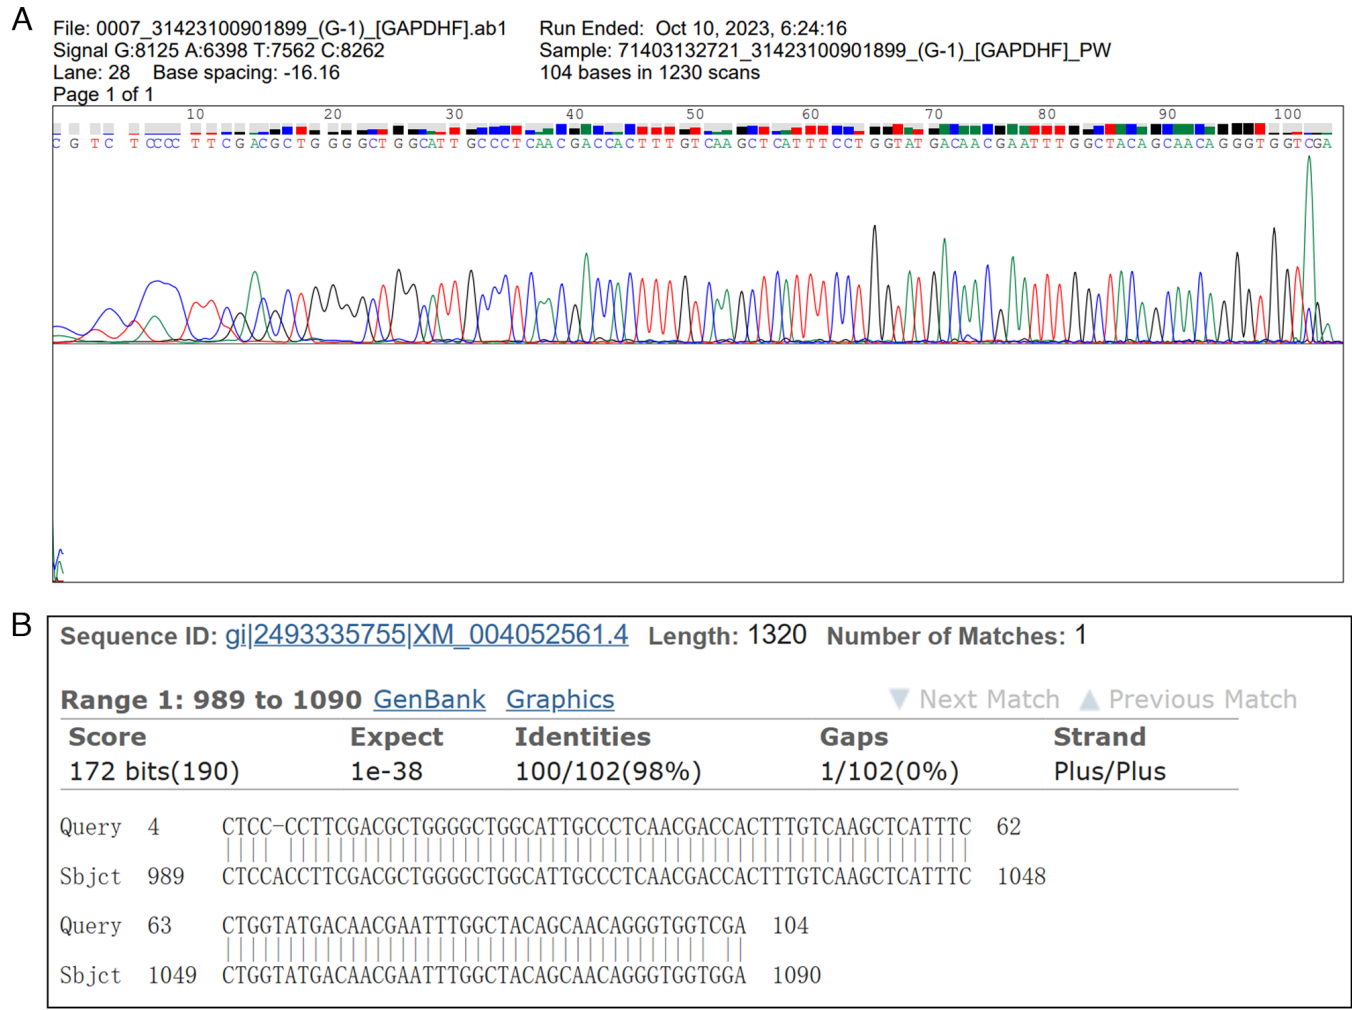

Supplement: Supplementary file 1 [file downloadSupplementary]
